# Supplementary material for: Proposal and validation of a method to classify genetic subtypes of diffuse large B cell lymphoma
Source: PubMed Central journal article supplement (PMC7820010; doi:10.1038/s41598-020-80376-0), 2021-01-21
Supplement: 41598_2020_80376_MOESM2_ESM.pdf [file 41598_2020_80376_MOESM2_ESM.pdf]

## Proposal and validation of a method to classify genetic subtypes of diffuse large B cell lymphoma

Lucía Pedrosa<sup>1,2,+</sup>, Ismael Fernández-Miranda<sup>1,2,+</sup>, David Pérez-Callejo<sup>3,4,+</sup>, Cristina Quero<sup>5</sup>, Marta Rodríguez<sup>6,7</sup>, Paloma Martín-Acosta<sup>7,8</sup>, Sagrario Gómez<sup>1</sup>, Julia González-Rincón<sup>1,7</sup>, Adrián Santos<sup>8</sup>, Carlos Tarín<sup>9,10</sup>, Juan F. García<sup>7,11</sup>, Francisco R. García-Arroyo<sup>12</sup>, Antonio Rueda<sup>13</sup>, Francisca I. Camacho<sup>14</sup>, Mónica García-Cosío<sup>15</sup>, Ana Heredero<sup>1</sup>, Marta Llanos<sup>16</sup>, Manuela Mollejo<sup>7,17</sup>, Miguel Piris-Villaespesa<sup>18</sup>, José Gómez-Codina<sup>19</sup>, Natalia Yanguas-Casás<sup>1</sup>, Antonio Sánchez<sup>3</sup>, Miguel A. Piris<sup>6,7</sup>, Mariano Provencio<sup>3</sup>, Margarita Sánchez-Beato<sup>1,7\*</sup>

<sup>1</sup>Lymphoma Research Group, Medical Oncology Department, Instituto de Investigación Sanitaria Puerta de Hierro-Segovia de Arana, Madrid, Spain.

<sup>2</sup>PhD Program in Molecular Biosciences, Doctoral School, Universidad Autónoma de Madrid, Spain.

<sup>3</sup>Medical Oncology Department, Hospital Universitario Puerta de Hierro, Madrid, Spain.

<sup>4</sup>PhD Program in Medicine and Surgery, Doctoral School, Universidad Autónoma de Madrid, Spain.

<sup>5</sup>Medical Oncology Department, Hospital Universitario Virgen de la Victoria, Malaga, Spain.

<sup>6</sup>Pathology Department, Hospital Fundación Jiménez Díaz, Madrid, Spain.

<sup>7</sup>Centro de Investigación Biomédica en Red de Cáncer (CIBERONC), Madrid, Spain.

<sup>8</sup>Molecular Pathology Laboratory, Instituto de Investigación Sanitaria Puerta de Hierro-Segovia de Arana, Madrid, Spain.

<sup>9</sup>Bioinformatics Unit, Instituto de Investigación Sanitaria Puerta de Hierro-Segovia de Arana, Madrid, Spain.

<sup>10</sup>Basic Medical Sciences, Faculty of Medicine, Universidad CEU San Pablo, Madrid, Spain.

<sup>11</sup>Pathology Department, MD Anderson Cancer Center, Madrid, Spain.

<sup>12</sup>Medical Oncology Department, Complejo Hospitalario de Pontevedra, Pontevedra, Spain.

<sup>13</sup>Medical Oncology Department, Hospitales Universitarios Regional y Virgen de la Victoria, IBIMA, Malaga, Spain.

<sup>14</sup>Pathology Department, Hospital Universitario de Getafe, Madrid, Spain.

<sup>15</sup>Pathology Department, Hospital Universitario Ramón y Cajal, Madrid, Spain.

<sup>16</sup>Medical Oncology Department, Hospital Universitario de Canarias, Tenerife, Spain.

<sup>17</sup>Pathology Department, Hospital Virgen de la Salud, Toledo, Spain.

<sup>18</sup>Haematology Department, Hospital Universitario Ramón y Cajal, Madrid, Spain.

<sup>19</sup>Medical Oncology Department, Hospital Universitari i Politècnic La Fe, Valencia, Spain.

<sup>+</sup>L. Pedrosa, I. Fernández-Miranda and D. Pérez-Callejo contributed equally to this work.

### \*Corresponding Author:

Margarita Sánchez-Beato (PhD), E-mail: [msbeato@idiphim.org](mailto:msbeato@idiphim.org)

Instituto de Investigación Sanitaria Puerta de Hierro-Segovia de Arana,  
Calle Joaquín Rodrigo 2, Majadahonda, 28222 Madrid, Spain.

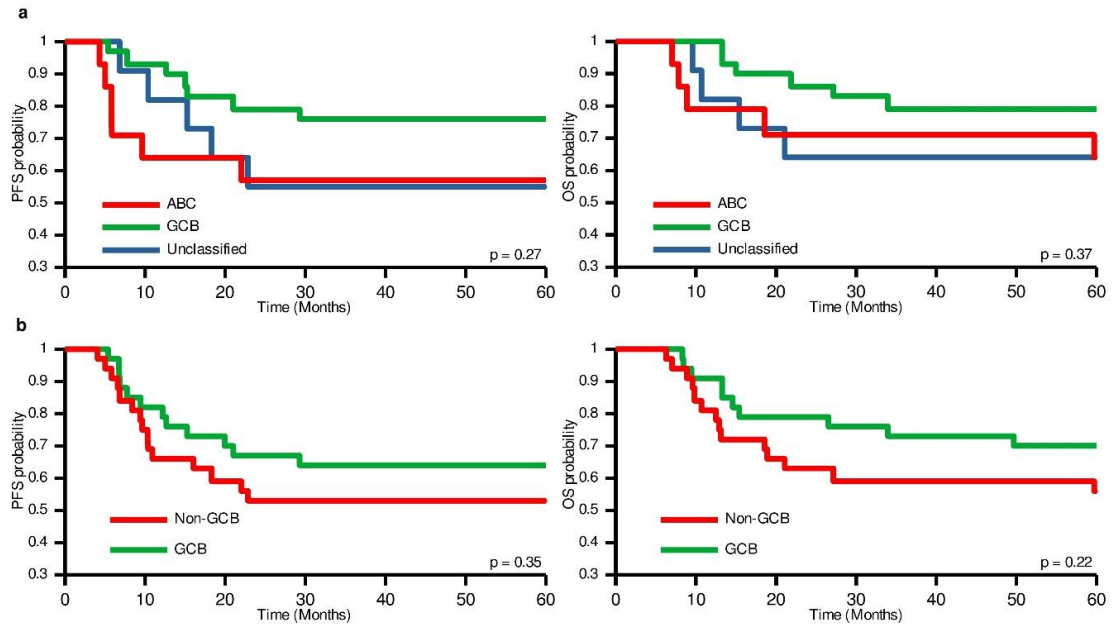

**Figure S1. Progression-free survival (PFS) and overall survival (OS) Kaplan-Meier analysis of cell-of-origin (COO) classification in the PdH cohort. A) Lymph2Cx classification; B) Hans classification. ABC: activated B-cell; GCB: germinal center B-cell.**

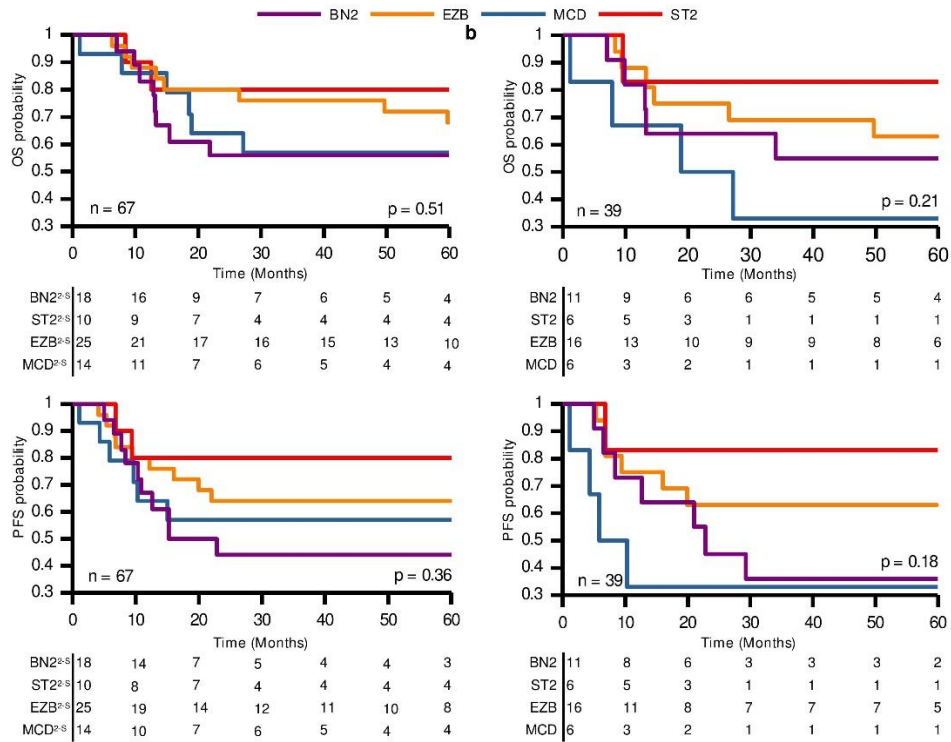

**Figure S2. Genetic subtypes from two-step and LymphGen methods in the PdH cohort.** Kaplan–Meier analysis of **A)** two-step and **B)** LymphGen genetic subtypes for overall survival (OS) and progression-free survival (PFS).

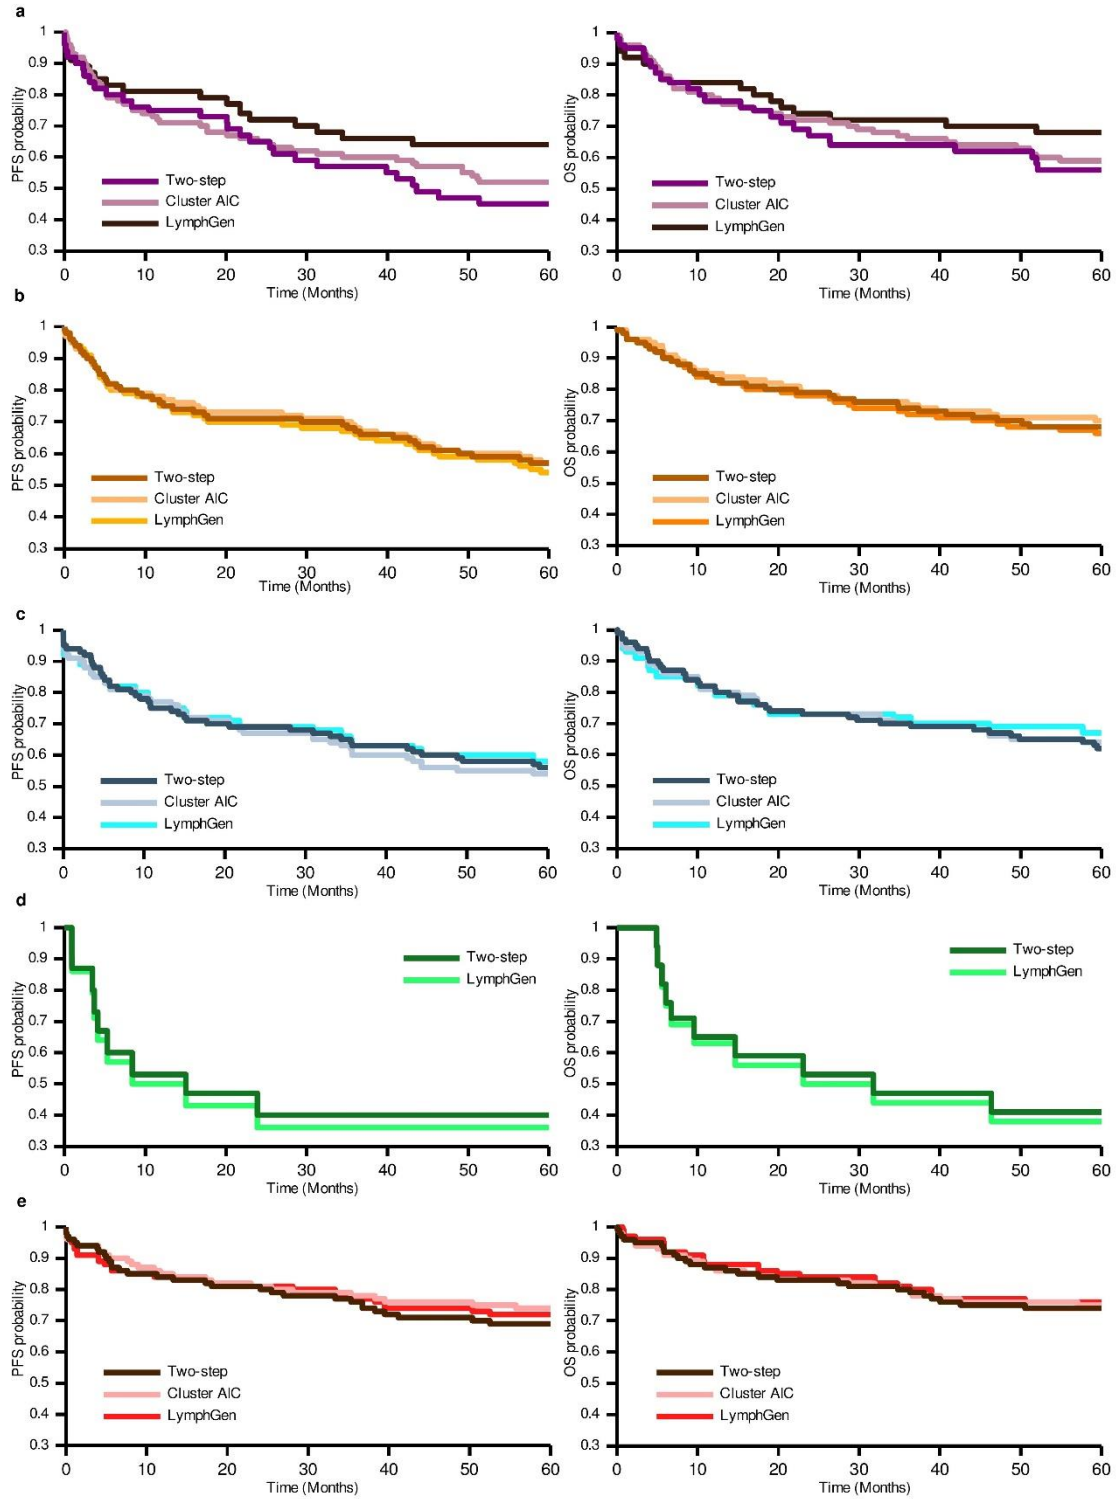

**Figure S3. Comparison between the classifiers.** Progression-free survival (PFS) and overall survival (OS) Kaplan-Meier analysis of **A)** BN2<sup>2-S</sup>/BN2/NOTCH2, **B)** EZB<sup>2-S</sup>/EZB/BCL2, **C)** MCD<sup>2-S</sup>/MCD/MYD88, **D)** N1<sup>2-S</sup>/N1 and **E)** ST2<sup>2-S</sup>/ST2/SGK1-TET2-SOCS1 in the HMRN cohort.

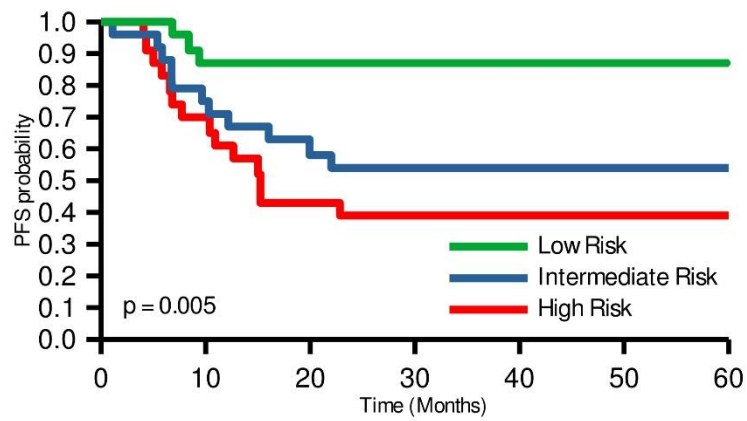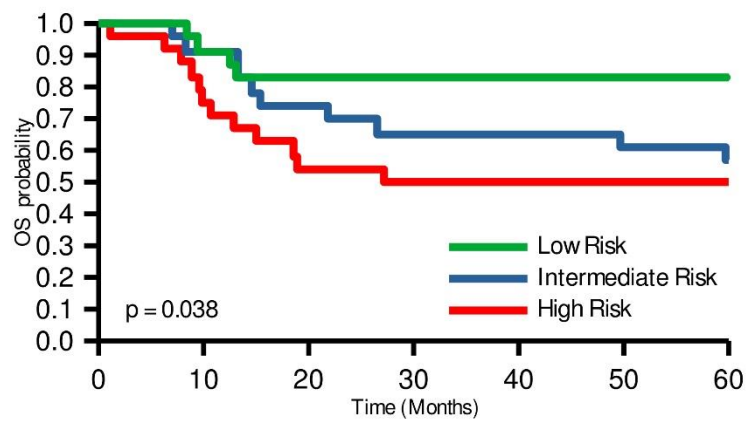

**Figure S4. Combinational model of IPI and genetic subtypes from two-step method in the PdH cohort.** Kaplan-Meier analysis of risk groups created by the Cox proportional-hazards multivariate model with IPI and genetic subtypes for progression-free survival (PFS) and overall survival (OS) status in the HMRN cohort and validated in the PdH cohort.

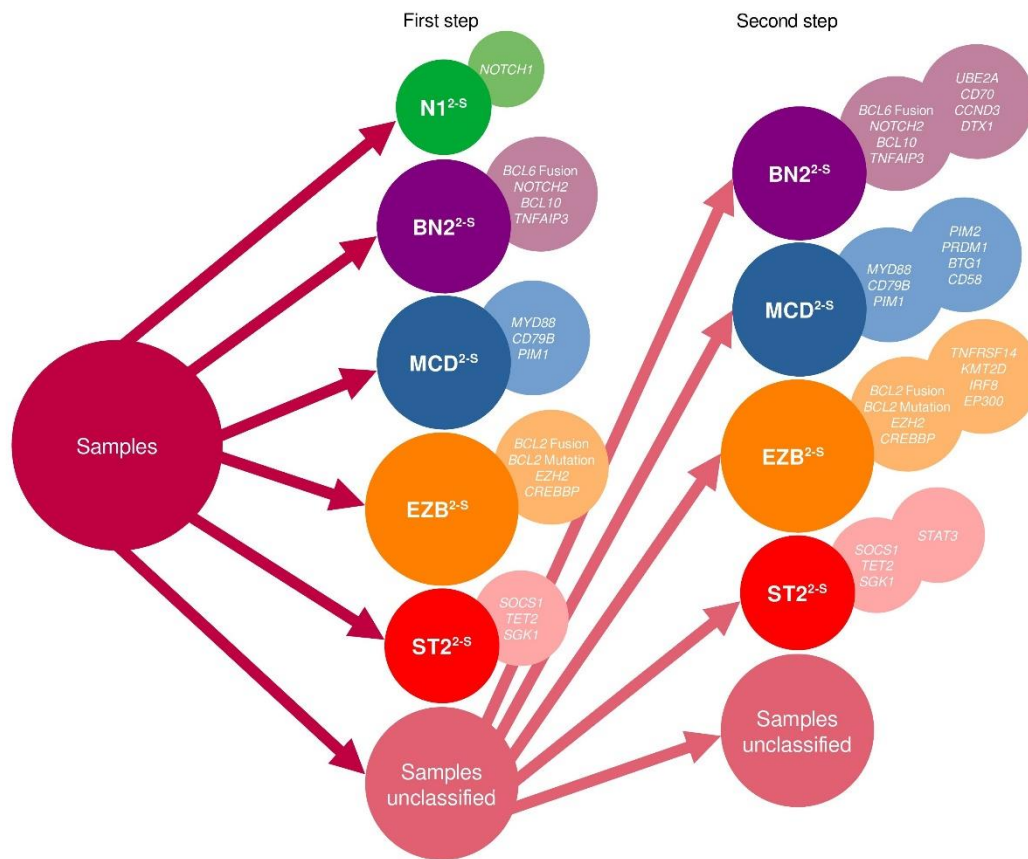

**Figure S5. Schematic representation of the two-step classifier for assigning subtypes to a sample.**
